# Supplementary material for: Improving African Swine Fever Surveillance Using Fluorescent Rapid Tests
Source: MDPI journal article supplement (doi:10.3390/pathogens12060811), 2023-06-07
Supplement: s1 [file s1]

### A. Ag-LFA

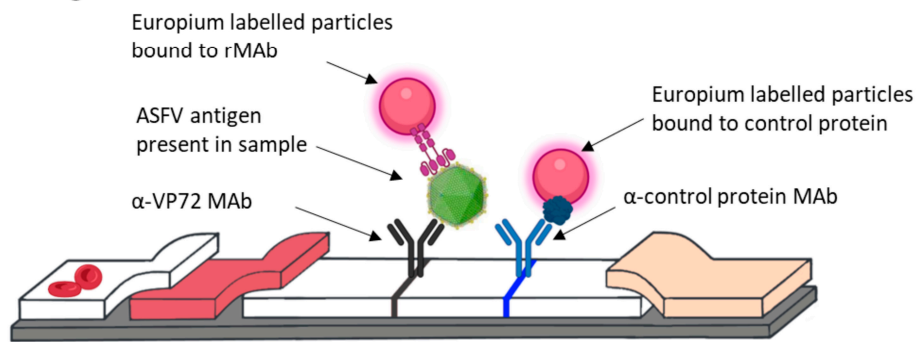

### B. Ab-LFA

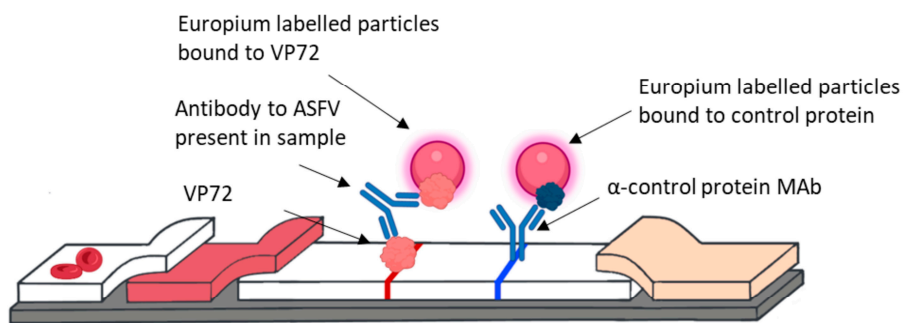

**Figure S1.** Scheme of the different components of the lateral flow tests. A. Fluorescent antigen test (Ag-LFA). B. Fluorescent antibody test (Ab-LFA).

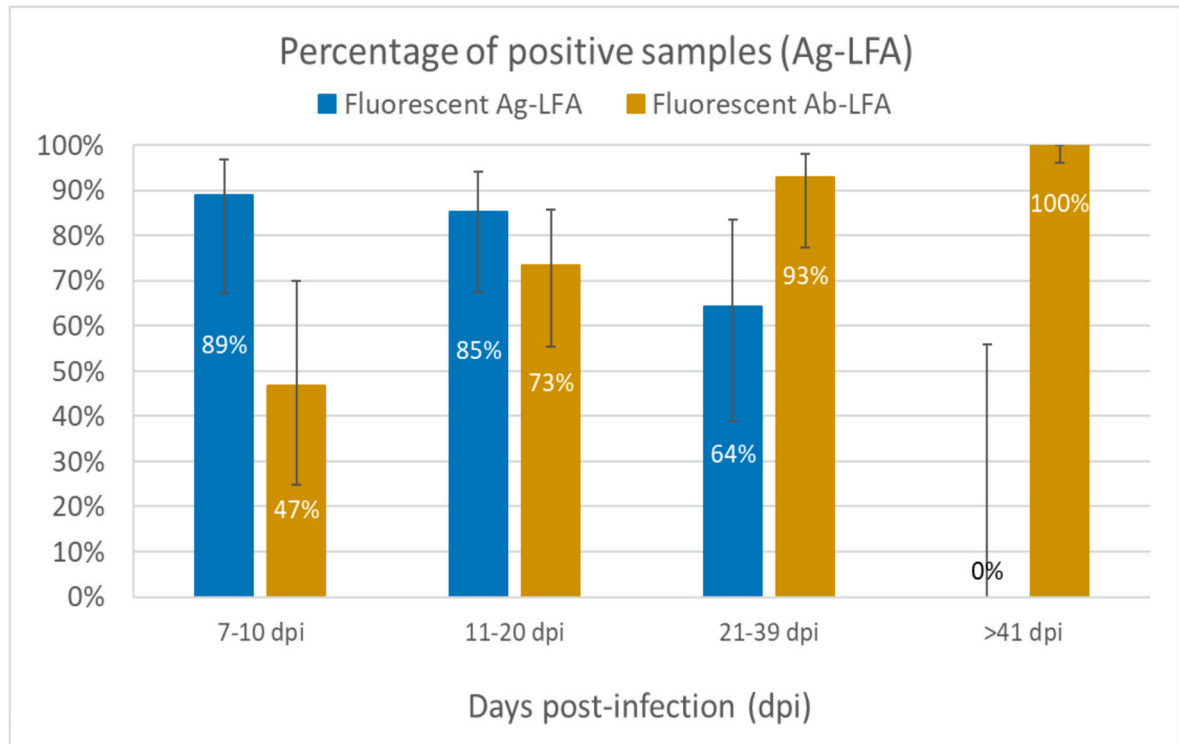

**Figure S2.** Percentage of positive samples with the new fluorescent assays: Ag-LFA and Ab-LFA in the different groups divided according to days post-infection. Bars show the 95% confidence interval for each group. Samples analyzed with Ag-LFA and Ab-LFA shown in the figure are not the same for both assays.
